# Supplementary material
Source: PubMed Central journal article supplement (PMC9737744)
Supplement: 13756_2022_1194_MOESM1_ESM.pdf [file 13756_2022_1194_MOESM1_ESM.pdf]

**Additional File 1 to:**

**Wastewater-based surveillance in Italy leading to the first detection of *mcr-10*-positive *Klebsiella quasipneumoniae***

Nicoletta Formenti<sup>1</sup>, Flavia Guarneri<sup>1</sup>, Cristina Bertasio<sup>1</sup>, Giovanni Parisio<sup>1</sup>, Claudia Romeo<sup>1,\*</sup>, Federico Scali<sup>1</sup>, Laura Birbes<sup>1</sup>, Maria Beatrice Boniotti<sup>1</sup>, Giuseppe Diegoli<sup>2</sup>, Loredana Candela<sup>3</sup>, Gianluca Antonio Romeo<sup>3,4</sup>, Paolo Pasquali<sup>5</sup>, Giovanni Loris Alborali<sup>1</sup>

<sup>1</sup>Istituto Zooprofilattico Sperimentale della Lombardia e dell'Emilia Romagna "Bruno Ubertini", Brescia, Italy; <sup>2</sup>Regione Emilia Romagna - Settore Prevenzione Collettiva e Sanità Pubblica, Bologna, Italy; <sup>3</sup>Ministero della Salute - Direzione Generale della Sanità Animale e dei Farmaci Veterinari, Roma, Italy; <sup>4</sup>Istituto Zooprofilattico Sperimentale dell'Abruzzo e del Molise "G. Caporale", Teramo, Italy; <sup>5</sup>Istituto Superiore di Sanità - Dipartimento di Sicurezza Alimentare, Nutrizione e Sanità Pubblica Veterinaria, Roma, Italy; \*corresponding author: Claudia Romeo (claudiarosa.romeo@izsler.it)

**Supplementary Table 1.** Primers and multiplex PCR protocol for the detection of mobile colistin resistance (*mcr*) genes from 1 to 10 in bacteria isolated from wastewater samples.

| Target        | Primer sequence (5'-3')                               | PCR mix                                       |         | Thermal profile |        |     |    |
|---------------|-------------------------------------------------------|-----------------------------------------------|---------|-----------------|--------|-----|----|
| <i>mcr-1</i>  | F: AGTCCGTTTGTCTTGTGGC<br>R: AGATCCTTGGTCTCGGCTTG     | DNA                                           | 2 µL    | 95°C            | 5 min  | x1  |    |
| <i>mcr-2</i>  | F: CAAGTGTGTTGGTCGCAGTT<br>R: TCTAGCCCGACAAGCATACC    |                                               |         |                 |        |     |    |
| <i>mcr-3</i>  | F: AAATAAAAATTGTTCCGCTTATG<br>R: AATGGAGATCCCCGTTTTT  | Dnase-free water                              | 6.75 µL | 95°C            | 30 s   | x30 |    |
| <i>mcr-4</i>  | F: TCACTTTCATCACTGCGTTG<br>R: TTGGTCCATGACTACCAATG    |                                               |         |                 |        |     |    |
| <i>mcr-5</i>  | F: ATGCGGTTGTCTGCATTTATC<br>R: TCATTGTGGTTGTCCTTTTCTG | QIAGEN Multiplex PCR Plus Kit Master Mix (2x) | 12.5 µL | 60°C            | 90 s   |     |    |
| <i>mcr-6</i>  | F: AGCTATGTCAATCCCGTGAT<br>R: ATTGGCTAGGTTGTCAATC     |                                               |         |                 |        |     |    |
| <i>mcr-7</i>  | F: GCCCTTCTTTTCGTTGTT<br>R: GGTTGGTCTCTTTCTCGT        | Primers premix (10 µM)                        | 1.25 µL | 72°C            | 60 s   |     |    |
| <i>mcr-8</i>  | F: TCAACAATTCTACAAAGCGTG<br>R: AATGCTGCGGAATGAAG      |                                               |         |                 |        |     |    |
| <i>mcr-9</i>  | F: TTCCTTTGTTCTGGTTG<br>R: GCAGGTAATAAGTCGGTC         | Coral Dye                                     | 2.5 µL  | 72°C            | 10 min |     | x1 |
| <i>mcr-10</i> | F: TGTTTGATCAGTCCATGATC<br>R: CGTGCCGTTTCGCCAATTA     |                                               |         |                 |        |     |    |

**Supplementary Table 2.** Allele profile of R55, R58 and R73 strains of *Klebsiella quasipneumoniae* subsp. *quasipneumoniae* isolated from wastewater samples.

| Gene   | <i>gapA</i> | <i>infB</i> | <i>mdh</i> | <i>pgi</i> | <i>phoE</i> | <i>rpoB</i> | <i>tonB</i> |
|--------|-------------|-------------|------------|------------|-------------|-------------|-------------|
| Allele | 18          | 15          | novel      | 16         | 11          | 13          | 51          |
